# Supplementary material for: Teaching Integer Programming by Scheduling the Belgian Soccer League
Source: Atypon-hosted journal article supplement (doi:10.1287/ited.2022.0269), 2022-05-25
Supplement: ited.2022.0269.sm1.xlsx [file ited.2022.0269.sm1.xlsx]

## Sheet: Sheet1
Soccer scheduling											Total penalty
Variables	Team											Penalty	Team
Number	AND	STA	CLU	ANT	GEN	GNK						Number	AND	STA	CLU	ANT	GEN	GNK
1	1											1	21	34	34	70	89	52			-
2		1										2	80	55	100	31	10	0
3			1									3	12	60	0	55	27	22
4				1								4	126	148	233	172	107	88
5					1							5	66	0	23	52	80	74
6						1						6	72	104	61	77	98	82
	Basic match schedule				Schedule
	Round 1				Round 1
	1	vs.	2		AND	vs.	STA
	3	vs.	4		CLU	vs.	ANT
	5	vs.	6		GEN	vs.	GNK
	Round 2				Round 2
	2	vs.	5		STA	vs.	GEN
	4	vs.	1		ANT	vs.	AND
	6	vs.	3		GNK	vs.	CLU
	Round 3				Round 3
	1	vs.	6		AND	vs.	GNK
	2	vs.	4		STA	vs.	ANT
	5	vs.	3		GEN	vs.	CLU
	Round 4				Round 4
	3	vs.	2		CLU	vs.	STA
	5	vs.	1		GEN	vs.	AND
	6	vs.	4		GNK	vs.	ANT
	Round 5				Round 5
	2	vs.	6		STA	vs.	GNK
	4	vs.	5		ANT	vs.	GEN
	1	vs.	3		AND	vs.	CLU
